# Supplementary material
Source: PubMed Central journal article supplement (PMC9016096)
Supplement: NIHMS1749374-supplement-1.pdf [file NIHMS1749374-supplement-1.pdf]

## **ITEM S1: PATIENT INTERVIEW GUIDE**

- 1. What have your providers told you about your kidney disease?**
  - a. How long have you known you have kidney disease?
  - b. What was your kidney disease caused by?
  - c. How serious is your kidney disease?
  - d. What have your providers told you could do if your kidney disease was to get worse over time?
  
- 2. What treatment options have been put on the table for your kidney disease?**
  - a. What about dialysis? Kidney transplant? Hospice and palliative care?
  - b. Would you choose to receive dialysis/kidney transplant/hospice and palliative care if faced with this decision?
  - c. How ready are you to make a decision about dialysis/kidney transplant/hospice and palliative care? Ready with enough information and knowledge? Mentally, emotionally, spiritually, physically, financially ready? With respect to your job or hobbies, your family and social relationship, your day-to-day life?
  - d. What do you hope to get out of dialysis/kidney transplant/hospice and palliative care?
  - e. What are your greatest concerns about dialysis/kidney transplant/palliative care or hospice? How did your providers address them?
  - f. How in charge are you about making treatment decisions for your kidney disease?
  - g. Do you and your providers agree about treatments decisions made for your kidney disease?
  
- 3. Who or what else might be involved in decisions about treatment of your kidney disease?**
  - a. What is helpful to you in facing treatment decisions for your kidney disease? What hinders you?
  - b. Have you had to face any difficult thoughts or emotions in treatment decisions for your kidney disease? How have your providers addressed them?
  - c. Are there any providers who have had an influence on treatment decisions for your kidney disease?
  - d. Have there been any major health-related or medical events that have influenced treatment decisions for your kidney disease?
  - e. Have there been any non-medical factors that have influenced treatment decisions for your kidney disease?

### Generic probing questions:

- 1) *Can you tell me more about ...?*
- 2) *What do you mean by...?*
- 3) *Can you tell me example of...?*
- 4) *What was that like?*

## **ITEM S2: PROVIDER INTERVIEW GUIDE**

- 4. Very briefly, please describe your relationship to [patient].**
  - a. How did you come to meet [patient]?
  - b. How long have you had a relationship with [patient]?
- 5. What have you told [patient] about [his/her] kidney disease?**
  - e. What have you told [patient] that [he/she] could do if [his/her] kidney disease was to get worse over time?
- 6. What treatment options have been put on the table for [patient's] kidney disease?**
  - h. What about dialysis/kidney transplant/hospice and palliative care?
  - i. What recommendations have you made about the best treatment option for [patient]?
  - j. How ready is [patient] to make a decision about dialysis/kidney transplant/hospice and palliative care? Ready with enough information and knowledge? Mentally, emotionally, spiritually, physically or financially ready? With respect to [patient's] job or hobbies, family and social relationships, or day-to-day life?
  - k. What are your greatest concerns about dialysis/kidney transplant/palliative care or hospice for [patient]? How have you addressed them?
  - l. How sure are you about the best treatment option for [patient]?
  - m. Would [patient] choose to receive dialysis/kidney transplant/hospice and palliative care if faced with this decision?
  - n. Do you and [patient] agree on decisions about dialysis/kidney transplant/hospice and palliative care?
- 7. Who or what else might be involved in decisions about treatment of [patient's] kidney disease?**
  - f. What has helped you in making treatment decisions with [patient] about [his/her] kidney disease? What has hindered you?
  - g. Have you had to face any difficult thoughts or emotions in treatment decisions about [patient's] kidney disease? How have you addressed them?
  - h. Are there any other providers who have had an influence on treatment decisions about [patient's] kidney disease?
  - i. Have there been any major health-related or medical events that have influenced treatment decisions about [patient's] kidney disease?
  - j. Have there been any non-medical factors for [patient] that have influenced treatment decisions about [patient's] kidney disease?

### **Generic probing questions:**

- 5) *Can you tell me more about ...?*
- 6) *What do you mean by...?*
- 7) *Can you tell me example of...?*
- 8) *What was that like?*

| <b>Table S1: Exemplar quotes from patients' medical records reflecting the range of documentation on patient preferences for different treatments for advanced CKD.</b>                                               |
|-----------------------------------------------------------------------------------------------------------------------------------------------------------------------------------------------------------------------|
| <i>"Planned Modality: peritoneal dialysis. Access Plan: PD cath when appropriate, has not seen surgery yet."</i>                                                                                                      |
| <i>"Pt prefers in-center treatment. I discussed the need to prepare for vascular access early, as fistula would take time to mature. Despite extensive counseling, patient decline referral to Vascular Surgery."</i> |
| <i>"He adamantly refuses to talk about dialysis and instead insists on getting a kidney transplant. Unfortunately, he is not a transplant candidate at this time."</i>                                                |
| <i>"She is actively listed for kidney transplant."</i>                                                                                                                                                                |
| <i>"advanced age, significant comorbidities and now worsening cognitive function undertaking dialysis not be ideal or recommended."</i>                                                                               |
| <i>"At this rate, he's likely to need dialysis for volume concerns during calendar year [year]. He's prepared with a nice fistula."</i>                                                                               |
| <i>"He indicated that he was not sure which RRT modality he was interested in learning more about that, that he was not interested in pursuing a kidney transplant at this time."</i>                                 |
| <i>"Pt is not a PD candidate given multiple abdominal surgeries. Pt is interested in hemodialysis."</i>                                                                                                               |
| <i>"she does not want dialysis even if it means that without it, she would have a shorter lifespan"</i>                                                                                                               |
| <i>"At this time, he is still unclear about whether dialysis is something that he would want for himself. He would be amenable to try dialysis and see how things go."</i>                                            |
| <i>"Would not want dialysis but might if was on the transplant list."</i>                                                                                                                                             |
